# Supplementary material
Source: Springer Nature journal article supplement (https://www.springermedizin.de/resource/supplementary/12960_2008_214_MOESM6_ESM.pdf/9570716)

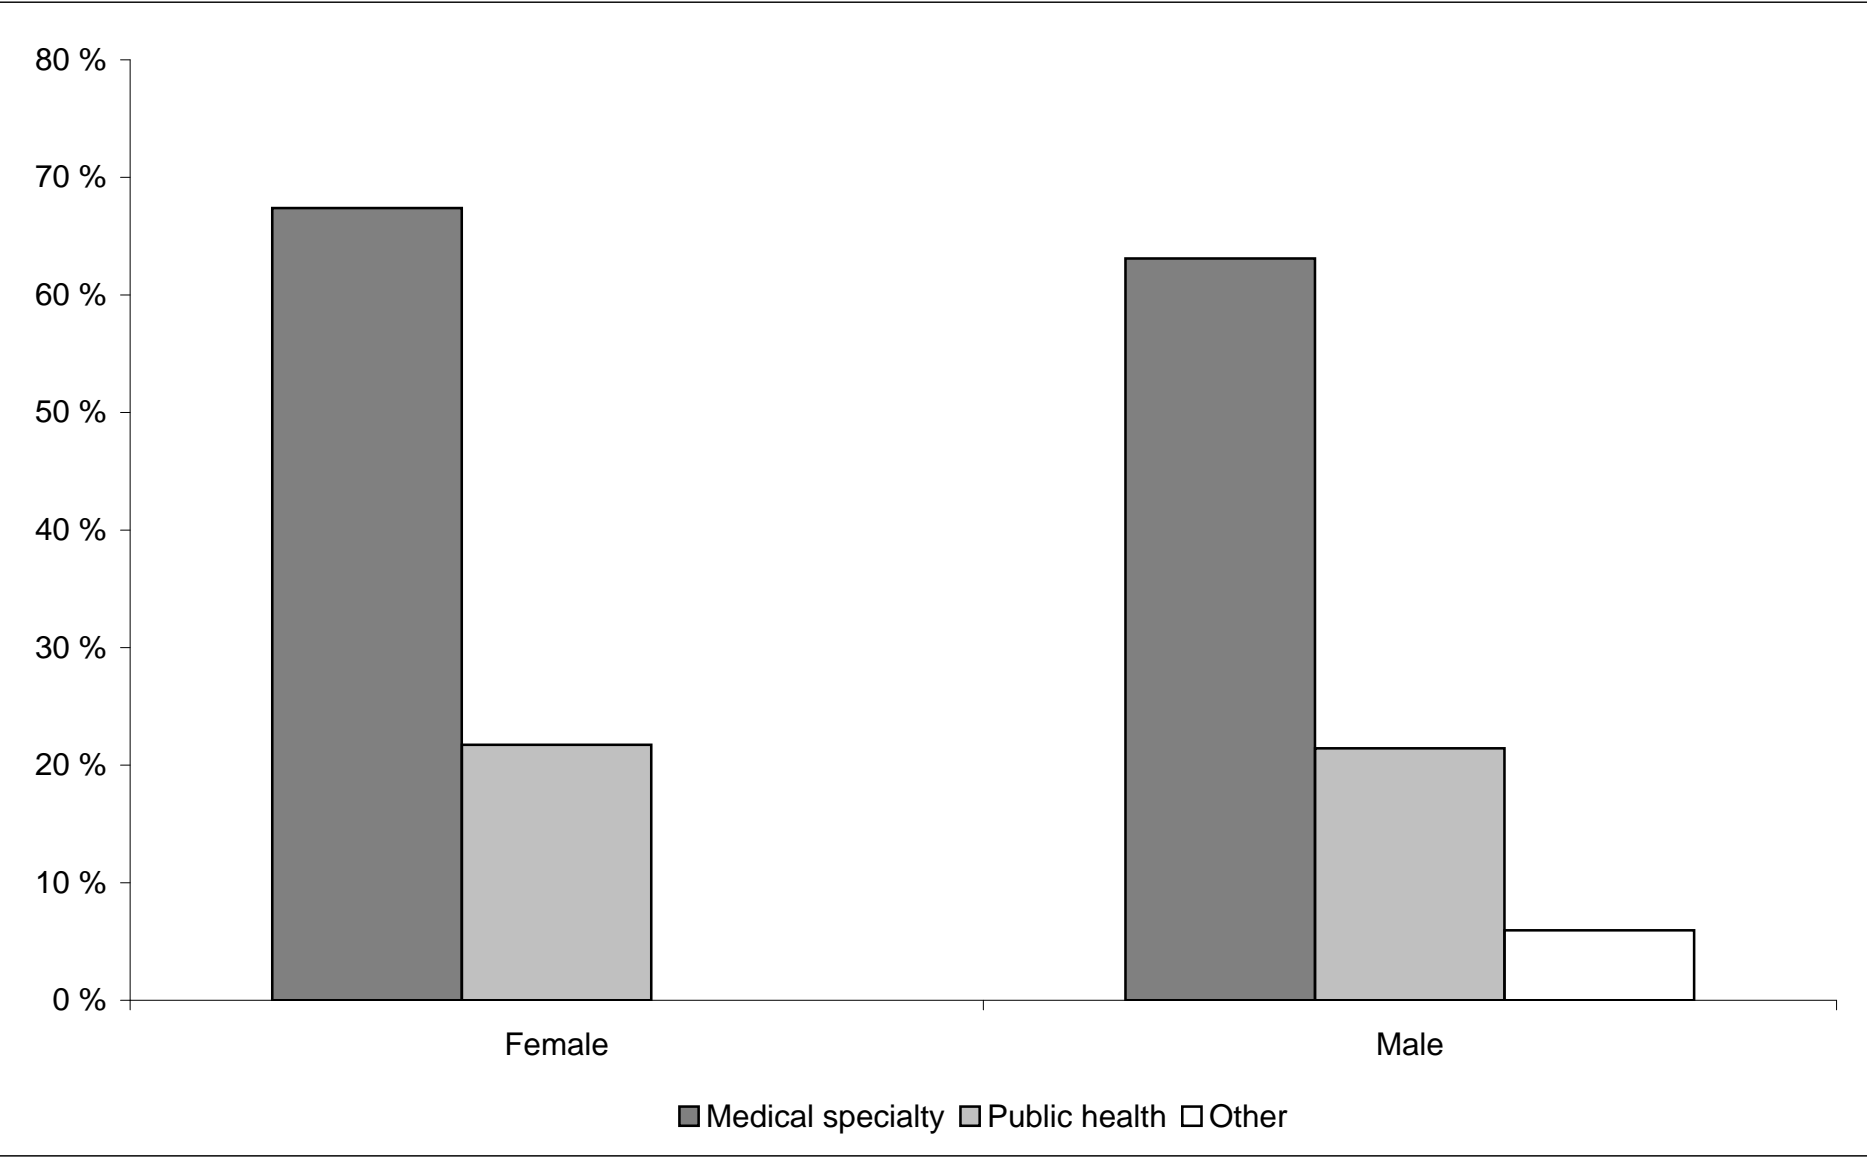

Supplement: MOESM6 [file 9570716]
